# Supplementary material for: Identifying the Biological Characteristics of Anthracnose Pathogens of Blueberries (Vaccinium corymbosum L.) in China
Source: MDPI journal article supplement (doi:10.3390/f15010117), 2024-01-07
Supplement: s1 [file s1]

**Supplementary material Table S1.** List of *Colletotrichum* spp. strains used for phylogenetic analysis

| Species                                    | Culture                    | Host/Tissue                                    | Country   | GenBank accession number <sup>b</sup> |                 |                 |                 |                 |                 |
|--------------------------------------------|----------------------------|------------------------------------------------|-----------|---------------------------------------|-----------------|-----------------|-----------------|-----------------|-----------------|
|                                            |                            |                                                |           | ITS                                   | GAPDH           | ACT             | TUB2            | CAL             | ApMAT           |
| <i>C. aenigma</i>                          | ICMP 18608 <sup>T</sup>    | <i>Persea americana</i>                        | Israel    | JX010244                              | JX010044        | JX009443        | JX010389        | JX009683        | KM360143        |
| <i>C. aenigma</i>                          | ICMP 18686                 | <i>Pyrus pyrifolia</i>                         | Japan     | JX010243                              | JX009913        | JX009519        | JX010390        | JX009684        | -               |
| <i>C. aenigma</i>                          | N2-1                       | <i>Vaccinium corymbosum</i>                    | China     | <b>LC776010</b>                       | <b>LC776014</b> | <b>LC776012</b> | <b>LC776018</b> | <b>LC776016</b> | <b>LC776020</b> |
|                                            | N2-2                       |                                                |           | <b>LC782545</b>                       | <b>LC782554</b> | <b>LC782546</b> | <b>LC782558</b> | <b>LC782550</b> | <b>LC782562</b> |
| <i>C. aeshynomenes</i>                     | ICMP 17673 <sup>T</sup>    | <i>Aeschynomene virginica</i>                  | USA       | JX010176                              | JX009930        | JX009483        | JX010392        | JX009721        | KM360145        |
| <i>C. alatae</i>                           | CBS 304.67 <sup>T</sup>    | <i>Dioscorea alata</i>                         | India     | JX010190                              | JX009990        | JX009471        | JX010383        | JX009738        | KC888932        |
| <i>C. asianum</i>                          | CBS 130418 <sup>T</sup>    | <i>Coffea arabica</i>                          | Thailand  | FJ972612                              | JX010053        | JX009584        | JX010406        | FJ917506        | FR718814        |
| <i>C. chrysophilum</i>                     | CMM 4268 <sup>T</sup>      | <i>Musa</i> sp.                                | Brazil    | KX094252                              | KX094183        | KX093982        | KX094285        | KX094063        | KX094325        |
| <i>C. cordylincola</i>                     | ICMP 18579 <sup>T</sup>    | <i>Cordyline fruticosa</i>                     | Thailand  | JX010226                              | JX009975        | HM470235        | JX010440        | HM470238        | JQ899274        |
| <i>C. fructicola</i>                       | CGMCC3.17889               | <i>Camellia sinensis</i>                       | China     | KU251520                              | KU251974        | KU251601        | KU252152        | KU251763        | KU251706        |
| <i>C. fructicola</i>                       | MQ11.3                     | <i>Cunninghamia lanceolata</i>                 | China     | MZ891645                              | MZ912703        | MZ912807        | MZ912859        | MZ912911        | MZ912955        |
|                                            | NG5-1                      |                                                |           | <b>LC782542</b>                       | <b>LC782555</b> | <b>LC782547</b> | <b>LC782559</b> | <b>LC782551</b> | <b>LC782563</b> |
| <i>C. fructicola</i>                       | NG5-2                      | <i>Vaccinium corymbosum</i>                    | China     | <b>LC782543</b>                       | <b>LC782556</b> | <b>LC782548</b> | <b>LC782560</b> | <b>LC782552</b> | <b>LC782564</b> |
|                                            | NG5-3                      |                                                |           | <b>LC782544</b>                       | <b>LC782557</b> | <b>LC782549</b> | <b>LC782561</b> | <b>LC782553</b> | <b>LC782565</b> |
|                                            | NG5-4                      |                                                |           | <b>LC776011</b>                       | <b>LC776015</b> | <b>LC776013</b> | <b>LC776019</b> | <b>LC776017</b> | <b>LC776021</b> |
| <i>C. gloeosporioides</i>                  | LC3382                     | <i>Ca. sinensis</i> , pathogen                 | China     | KJ955176                              | KJ954877        | KJ954450        | KJ955323        | KJ954728        | KJ954584        |
| <i>C. gloeosporioides</i>                  | SMCG1.C                    | <i>Cu. lanceolata</i>                          | China     | MZ891644                              | MZ912702        | MZ912806        | MZ912858        | MZ912910        | MZ912954        |
| <i>C. henanense</i>                        | CGMCC 3.17354 <sup>T</sup> | <i>Camellia sinensis</i>                       | China     | KJ955109                              | KJ954810        | KM023257        | KJ955257        | KJ954662        | KJ954524        |
| <i>C. henanense</i>                        | LC2820                     | <i>Cirsium japonicum</i> ,<br>pathogen         | China     | KM610182                              | KM610178        | KM610172        | KM610184        | KM610176        | KM610174        |
| <i>C. horii</i>                            | ICMP 10492 <sup>T</sup>    | <i>Diospyros kaki</i>                          | Japan     | GQ329690                              | GQ329681        | JX009438        | JX010450        | JX009604        | JQ807840        |
| <i>C. horii</i>                            | ICMP 17968                 | <i>Diospyros kaki</i>                          | China     | JX010212                              | GQ329682        | JX009547        | JX010378        | JX009605        | -               |
| <i>C. Jiangxiense</i>                      | CGMCC 3.17363 <sup>T</sup> | <i>Camellia sinensis</i>                       | China     | KJ955201                              | KJ954902        | KJ954471        | KJ955348        | KJ954752        | KJ954607        |
| <i>C. Jiangxiense</i>                      | CGMCC 3.17362              | <i>Ca. sinensis</i> , endophyte                | China     | KJ955198                              | KJ954899        | KJ954469        | KJ955345        | KJ954749        | KJ954604        |
| <i>C. kahawae</i> subsp.<br><i>kahawae</i> | ICMP 17816 <sup>T</sup>    | <i>Coffea arabica</i>                          | Kenya     | JX010231                              | JX010012        | JX009452        | JX010444        | JX009642        | JQ894579        |
| <i>C. queenslandicum</i>                   | ICMP 1778 <sup>T</sup>     | <i>Carica papaya</i>                           | Australia | JX010276                              | JX009934        | JX009447        | JX010414        | JX009691        | KC888928        |
| <i>C. salsolae</i>                         | ICMP 19051 <sup>T</sup>    | <i>Salsola tragus</i>                          | Hungary   | JX010242                              | JX009916        | JX009562        | JX010403        | JX009696        | KC888925        |
| <i>C. siamense</i>                         | LC2969                     | <i>Camellia oleifera</i> ,<br>pathogen         | China     | KJ955092                              | KJ954793        | KJ954374        | KJ955241        | KJ954645        | KJ954508        |
| <i>C. siamense</i>                         | YK102                      | <i>Cu. lanceolata</i>                          | China     | MZ891655                              | MZ912713        | MZ912817        | MZ912869        | MZ912921        | MZ912965        |
| <i>C. theobromicola</i>                    | CBS 124945 <sup>T</sup>    | <i>Theobroma cacao</i>                         | Panama    | JX010294                              | JX010006        | JX009444        | JX010447        | JX009591        | KC790726        |
| <i>C. theobromicola</i>                    | CBS 142.31                 | <i>Fragaria</i> × <i>ananassa</i>              | USA       | JX010286                              | JX010024        | JX009516        | JX010373        | JX009592        | JQ807844        |
| <i>C. tropicale</i>                        | CBS 124949 <sup>T</sup>    | <i>Theobroma cacao</i>                         | Panama    | JX010264                              | JX010007        | JX009489        | GU994454        | JX009719        | GU994425        |
| <i>C. tropicale</i>                        | MAFF 239933                | <i>Litchi chinensis</i>                        | Japan     | JX010275                              | JX010020        | JX009480        | JX010396        | JX009722        | -               |
| <i>C. wuxiense</i>                         | CGMCC 3.17894 <sup>T</sup> | <i>Camellia sinensis</i>                       | China     | KU251591                              | KU252045        | KU251672        | KU252200        | KU251833        | KU251722        |
| <i>Colletotrichum boninense</i>            | CBS 123755 <sup>T</sup>    | <i>Crinum asiaticum</i> var.<br><i>sinicum</i> | Japan     | JQ005153                              | JQ005240        | JQ005501        | JQ005588        | JQ005674        | -               |

a ICMP, International Collection of Microorganisms from Plants (New Zealand); CBS, Westerdijk Fungal Biodiversity Institute (formerly Centraalbureau voor Schimmelcultures) (The Netherlands); COAD: Coleção Octávio Almeida Drummond, Viçosa, Brazil; CGMCC, China General Microbiological Culture Collection Center (China); MFLUCC: Mae Fah Luang University Culture Collection, Chiang Rai,

Thailand; CMM: Culture Collection of Phytopathogenic Fungi, Prof. Maria Menezes, Federal Rural University of Pernambuco, Brazil; GZAAS, Guizhou Academy of Agricultural Sciences (China); <sup>T</sup> indicates the ex-type cultures.

b ITS: internal transcribed spacer; GAPDH: glyceraldehyde 3-phosphate dehydrogenase; ACT: actin; TUB2: beta tubulin; CAL: calmodulin; ApMAT: intergenic sequence between Apn2 DNA lyase and MAT1-2-1. -: not available.
